# Supplementary material for: Methylome of human senescent hematopoietic progenitors
Source: PubMed Central journal article supplement (PMC6302458; doi:10.1186/s40164-018-0123-8), 2018-12-21

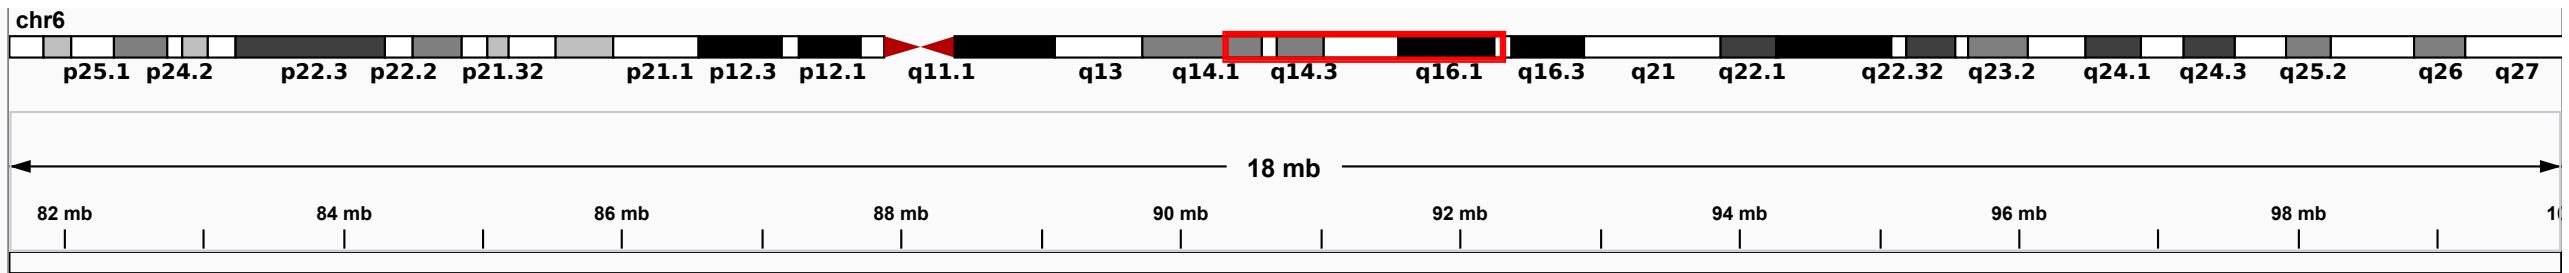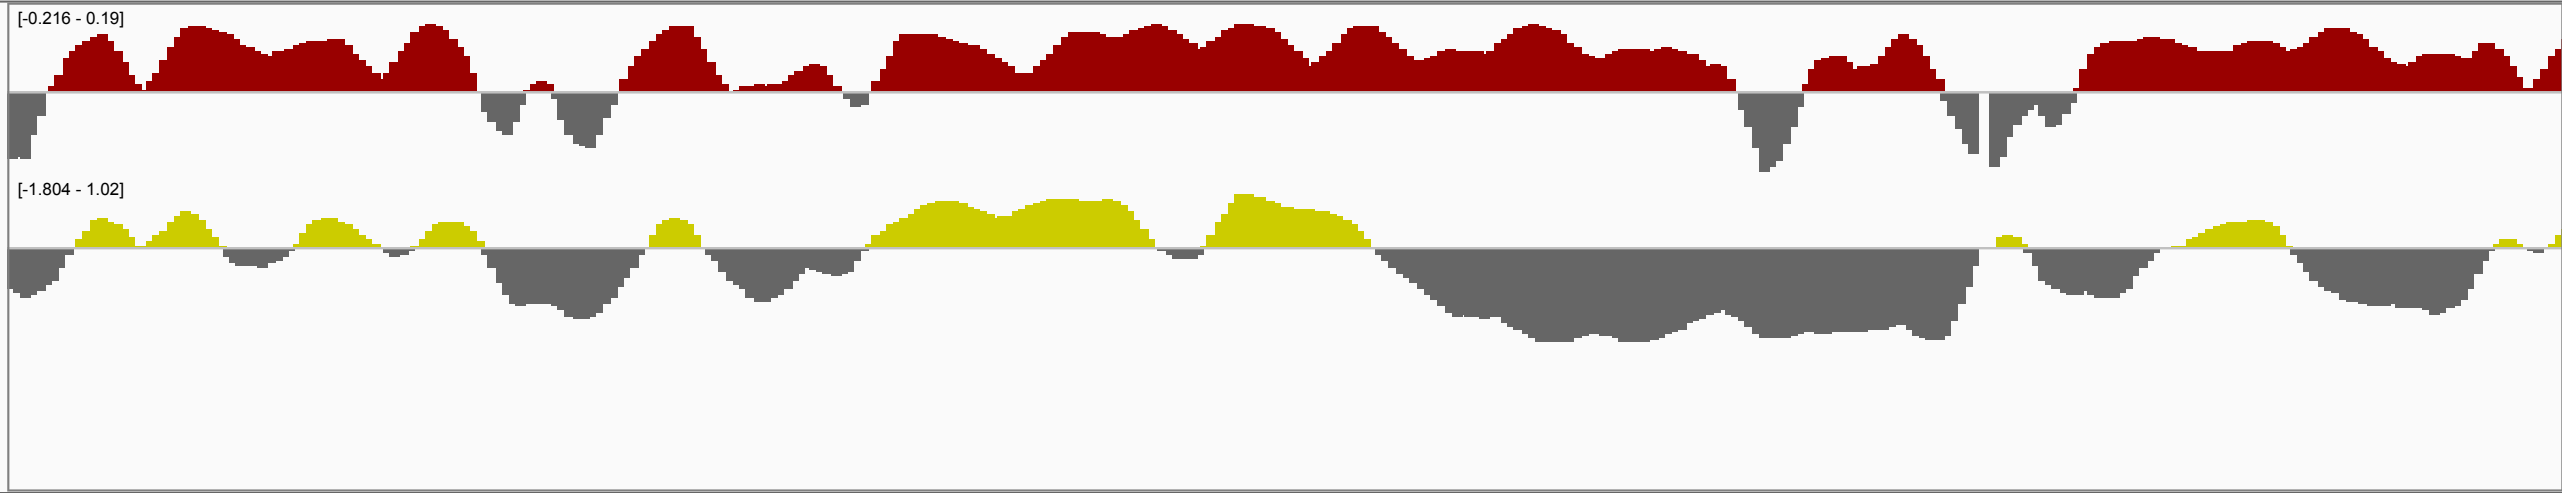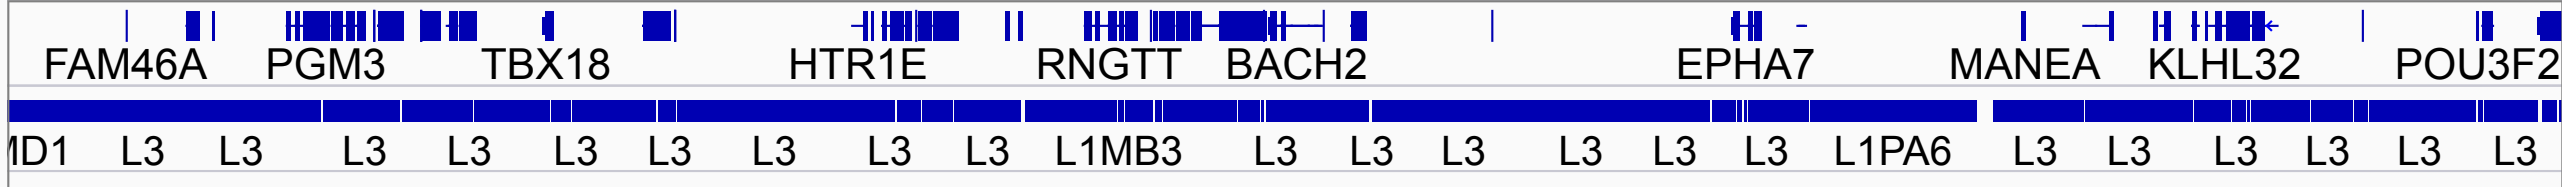

Supplement: 40164_2018_123_MOESM2_ESM.pdf [file 40164_2018_123_MOESM2_ESM.pdf]
